# Supplementary material
Source: Royal Society of Chemistry journal article supplement (doi:10.1039/d6gc02110g)
Supplement: d6gc02110g1.pdf [file d6gc02110g1.pdf]

## Supporting information for

### Time-release catalysis for cascade hydrolytic hydrogenation of cellulose

Junyan Fu <sup>a</sup>, Shihan Zhang <sup>a</sup>, Bingjie Qiu <sup>a</sup>, Richard Lee Smith, Jr <sup>b</sup>, Xinhua Qi<sup>a, \*</sup>

<sup>a</sup> College of Environmental Science and Engineering, Nankai University, No. 38, Tongyan Road, Jinnan District, Tianjin 300350, China

<sup>b</sup> Graduate School of Environmental Studies, Tohoku University, Aramaki Aza Aoba 468-1, Aoba-ku, Sendai 980-8572, Japan

| Item                                                                                                                                                                                                                                                                                                                                              | Page |
|---------------------------------------------------------------------------------------------------------------------------------------------------------------------------------------------------------------------------------------------------------------------------------------------------------------------------------------------------|------|
| <b>Experimental Section</b>                                                                                                                                                                                                                                                                                                                       | S3   |
| <b>Table S1.</b> Detailed dosage of phosphorus source and hydrothermal conditions for synthesis of NiPO <sub>4</sub> @POL- <i>t</i> and NiP@C- <i>x</i> samples.                                                                                                                                                                                  | S5   |
| <b>Fig. S1.</b> FT-IR spectra of Fulvic acid (FA) and FA-Ni <sup>2+</sup> .                                                                                                                                                                                                                                                                       | S6   |
| <b>Fig. S2.</b> XRD patterns of solids containing NiPO <sub>4</sub> precipitated at two different mixing times and conditions.                                                                                                                                                                                                                    | S7   |
| <b>Fig. S3.</b> XRD patterns of (a) NiPO <sub>4</sub> @POL-2 and (b) NiPO <sub>4</sub> @POL-12 in FA solution. High-resolution XPS spectra of: (b) C 1s, (c) P 2p core-level spectra of NiPO <sub>4</sub> @POL-2 and NiPO <sub>4</sub> @POL-12 (NiPO <sub>4</sub> @POL- <i>t</i> , <i>t</i> represents the hydrothermal reaction time at 200 °C). | S8   |
| <b>Fig. S4.</b> XRD patterns of NiPO <sub>4</sub> @POL-24 and NiPO <sub>4</sub> (hydrothermal time: 24 h).                                                                                                                                                                                                                                        | S9   |
| <b>Fig. S5.</b> (a) Chemical reactions during reduction and carbonization of NiPO <sub>4</sub> @POL-24 to NiP@C-3 under a hydrogen atmosphere, (b) Raman spectra of NiP@C-3 (I <sub>D</sub> and I <sub>G</sub> are the D-band and G-band Raman intensities).                                                                                      | S10  |
| <b>Fig. S6.</b> (a) TEM image of NiP@C-3 and (b) particle size statistics of nanoparticles on the NiP@C-3 catalyst.                                                                                                                                                                                                                               | S11  |
| <b>Fig. S7.</b> Characterization of NiP (a,b) SEM images, (c) TEM image, (d) HRTEM image; characterization of NiP/AC (e) TEM image, (f) HRTEM image (preparation detailed in supporting information).                                                                                                                                             | S12  |
| <b>Fig. S8.</b> (a) SEM image of NiP@C-3, inset: all elements overlapped mapping, (b) Map sum spectrum of NiP@C-3, (c) Elemental mapping for the same region of NiP@C-3 (C-red, O-green, P-violet and Ni-turquoise).                                                                                                                              | S13  |
| <b>Fig. S9.</b> Contact angle of (a) NiP@C-3, (b) NiP/AC and (c) NiP.                                                                                                                                                                                                                                                                             | S14  |
| <b>Fig. S10.</b> XPS spectra of Ni 2p and P 2p of (a, b) NiP/AC and (c, d) NiP.                                                                                                                                                                                                                                                                   | S15  |
| <b>Table S2.</b> Content of XPS spectrum surface elements in prepared samples.                                                                                                                                                                                                                                                                    | S16  |
| <b>Fig. S11.</b> Arrhenius plots of glucose hydrogenation over NiP@C-3.                                                                                                                                                                                                                                                                           | S17  |

E-mail: [qixinhua@nankai.edu.cn](mailto:qixinhua@nankai.edu.cn) (X. Qi).

|                                                                                                                                                              |     |
|--------------------------------------------------------------------------------------------------------------------------------------------------------------|-----|
| <b>Fig. S12.</b> XPS spectra of Ni 2p and P 2p of (a, b) spent NiP/AC and (c, d) spent NiP.                                                                  | S18 |
| <b>Fig. S13.</b> TEM images of (a) spent NiP, (c) spent NiP/AC; HRTEM images of (b) spent NiP, (d) spent NiP/AC.                                             | S19 |
| <b>Fig. S14.</b> (a) TEM and (b) HRTEM image of spent NiP@C-3.                                                                                               | S20 |
| <b>Fig. S15.</b> High-resolution XPS measurements of spent NiP@C-3, (a) Ni 2p and (b) P 2p.                                                                  | S21 |
| <b>Fig. S16.</b> XRD pattern of microcrystalline cellulose before and after ball milling.                                                                    | S22 |
| <b>Fig. S17.</b> Hydrolytic of untread and ball-milled cellulose in the deionized H <sub>2</sub> O and H <sub>3</sub> PO <sub>4</sub> solution.              | S23 |
| <b>Fig. S18.</b> TEM diagram of catalyst for ball milling                                                                                                    | S24 |
| <b>Fig. S19.</b> NH <sub>3</sub> -TPD profiles of NiP@C-3 catalyst.                                                                                          | S25 |
| <b>Fig. S20.</b> HPLC chromatogram of cellulose conversion in deionized H <sub>2</sub> O and catalyst leaching solution at 200 °C for 3 h.                   | S26 |
| <b>Fig. S21.</b> Humins generated from cellulose hydrolysis in the 5 mL of deionized H <sub>2</sub> O and catalysis leaching solution system.                | S27 |
| <b>Table S3.</b> Leaching phosphoric concentration and pH of cellulose reaction solution over the NiP, NiP@freeC and NiP@C-3 catalyst.                       | S28 |
| <b>Fig. S22.</b> HPLC chromatogram of cellulose conversion over the NiP@C-3, NiP and NiP@freeC at 200 °C for 3 h.                                            | S29 |
| <b>Fig. S23.</b> Arrhenius plots of glucose degradation in the NiP catalysis system simulated by using pH=1.8 of H <sub>3</sub> PO <sub>4</sub> solution.    | S30 |
| <b>Fig. S24</b> Arrhenius plots of glucose hydrogenation over the NiP.                                                                                       | S31 |
| <b>Fig. S25.</b> Arrhenius plots of glucose degradation in the NiP@C-3 catalysis system simulated by using pH=3.1 of H <sub>3</sub> PO <sub>4</sub> solution | S32 |
| <b>Fig. S26.</b> XRD pattern of spent NiP@C-3 and spent NiP.                                                                                                 | S33 |
| <b>Fig. S27.</b> Scheme of preparation, recycle, and regeneration of catalyst.                                                                               | S34 |
| <b>Fig. S28.</b> Catalytic performance for two catalyst-cellulose ratios.                                                                                    | S35 |
| <b>References</b>                                                                                                                                            | S36 |

## Experimental Section

### Preparation of NiP

10.8 mmol of  $\text{Ni}(\text{NO}_3)_2 \cdot 6\text{H}_2\text{O}$  was dissolved in 80 mL of deionized water to prepare solution A, while 7.2 mmol of  $(\text{NH}_4)_2\text{HPO}_4$  was dissolved in 20 mL of deionized water to prepare solution B. Solution B was then added drop by drop to solution A and stirred (600 rpm) at room temperature for 12 hours. The resulting mixture was transferred to a 200 mL high-pressure reactor with a Teflon lining and heated to 200 °C for 24 hours to produce  $\text{NiPO}_4$  (the precursor of NiP). After washing and drying,  $\text{NiPO}_4$  was reduced in a  $\text{H}_2$  atmosphere by heating from room temperature to 600 °C at a rate of 2 °C·min<sup>-1</sup> and maintaining this temperature for 4 h to obtain NiP, with a Ni loading of 76.7 wt.% and a P loading of 21.2 wt.%.

### Preparation of NiP/AC

NiP/AC was synthesized through precipitation onto activated carbon, resulting in a final composition of 29.5 wt.% Ni and 10.7 wt.% P. First, 10.8 mmol of  $\text{Ni}(\text{NO}_3)_2 \cdot 6\text{H}_2\text{O}$  were dissolved in 80 mL of deionized water. To this solution, 0.65 g of activated carbon (C, Aladdin Reagent Co., Ltd.) was added. 7.2 mmol of  $(\text{NH}_4)_2\text{HPO}_4$  (ammonium phosphate) was dissolved in 20 mL of deionized water. The  $(\text{NH}_4)_2\text{HPO}_4$  solution was then slowly added to the solution containing activated carbon and nickel ions, resulting in the formation of  $\text{NiPO}_4/\text{AC}$ , the precursor to NiP/AC. After stirring the mixture at 600 rpm for 12 hours, it was washed and dried at room temperature. Finally, the solid was reduced in a hydrogen ( $\text{H}_2$ ) atmosphere by heating from room temperature to 600 °C at a rate of 2 °C/min, and the temperature was maintained at 600 °C for 4 hours to obtain NiP/AC.

### Preparation of NiP@freeC

NiP@C-3 was heated in a muffle oven at 400 °C under air atmosphere for 2 hours to remove the carbon and obtain the NiP@freeC catalyst.

### DFT Calculation

The Vienna Ab Initio Package (VASP) was employed to perform the calculations based on the density functional theory (DFT) <sup>1-4</sup>. The interaction between the ion core and valence electron is described by using a projector augmented-wave (PAW) pseudopotential <sup>5, 6</sup>. The exchange-correlation interactions were treated by using the Perdew-Burke-Ernzerh of generalized gradient

approximation (GGA-PBE) formulation <sup>7</sup>. The kinetic energy cutoff for the plane-wave expansion was set to 450 eV. Partial occupancies of the Kohn–Sham orbitals were allowed using the Gaussian smearing method and a width of 0.2 eV. The electronic energy was considered self-consistent when the energy change was smaller than 10<sup>-5</sup> eV. A geometry optimization was done until the force was converged to 0.02 eV/Å<sup>-1</sup>, respectively. Besides, the DFT-D3 method of Grimme was used for describing the dispersion interactions among all the atoms in adsorption models of interest <sup>8</sup>.

NiP (001) facet model was constructed as a p (2×2) periodic slab of NiP bulk. NiP/AC contained a NiP cluster and a layer of graphene. The model of NiP encapsulated in one graphene shell consists of C<sub>60</sub> encapsulating a NiP cluster. A vacuum space of 15 Å is set along the z direction to ensure no interaction between adjacent images. During structural optimizations of the surface models, a 4×4×1 k-point mesh for Brillouin zone was used.

The reaction free energy change can be obtained with the equation below<sup>9</sup>:

$$\Delta G = \Delta E + \Delta E_{ZPE} - T\Delta S$$

where  $\Delta E$  is the total energy difference before and after intermediate adsorbed,  $\Delta E_{ZPE}$  and  $\Delta S$  are, respectively, the differences of zero-point energy and entropy. The zero point energy and entropy of free molecules and adsorbents were obtained from the vibrational frequency calculations.

### **Determination of phosphate anion leaching**

The leaching weight loss percentage was calculated by using the following formula:

$$\text{P leaching rate (\%)} = \frac{C_p * V}{m_p} \times 100\%$$

$C_p$  was the P concentration (mg/L) in PO<sub>4</sub><sup>3-</sup> solution after reaction detected by Ammonium molybdate spectrophotometric method, V was the volume of the reaction solution,  $m_p$  was the initial weight of P in fresh catalyst.

### **Recycle and reuse of P**

An amount of 0.9 mL of ammonia solution (2.5~2.8 wt%) was added to 20 mL of post-reaction solution, containing 388 mg/L of P element, and stirred for 10 minutes to generate (NH<sub>4</sub>)<sub>2</sub>HPO<sub>4</sub>, which is the phosphorus source for catalyst preparation. (NH<sub>4</sub>)<sub>2</sub>HPO<sub>4</sub> participating in catalyst preparation is described in detail part 2.2 of the text.

**Table S1.** Detailed dosage of phosphorus source and hydrothermal conditions for synthesis of NiPO<sub>4</sub>@POL-*t* and NiP@C-*x* samples. Molar dosage of Ni(NO<sub>3</sub>)<sub>2</sub> was fixed at 10.8 mmol.

| Sample                    | (NH <sub>4</sub> ) <sub>2</sub> HPO <sub>4</sub> dosage<br>(mmol) | Molar ratio (P:Ni) for<br>(NH <sub>4</sub> ) <sub>2</sub> HPO <sub>4</sub> : Ni(NO <sub>3</sub> ) <sub>2</sub> | Hydrothermal time<br>(h) |
|---------------------------|-------------------------------------------------------------------|----------------------------------------------------------------------------------------------------------------|--------------------------|
| NiPO <sub>4</sub> @POL-2  | 7.2                                                               | 6.6:10                                                                                                         | 2                        |
| NiPO <sub>4</sub> @POL-12 | 7.2                                                               | 6.6:10                                                                                                         | 12                       |
| NiPO <sub>4</sub> @POL-24 | 7.2                                                               | 6.6:10                                                                                                         | 24                       |
| NiPO <sub>4</sub> @POL-48 | 7.2                                                               | 6.6:10                                                                                                         | 48                       |
| NiP@C-1                   | 1.08                                                              | 1:10                                                                                                           | 24                       |
| NiP@C-2                   | 3.6                                                               | 3.3:10                                                                                                         | 24                       |
| NiP@C-3                   | 7.2                                                               | 6.6:10                                                                                                         | 24                       |
| NiP@C-4                   | 32.4                                                              | 30:10                                                                                                          | 24                       |

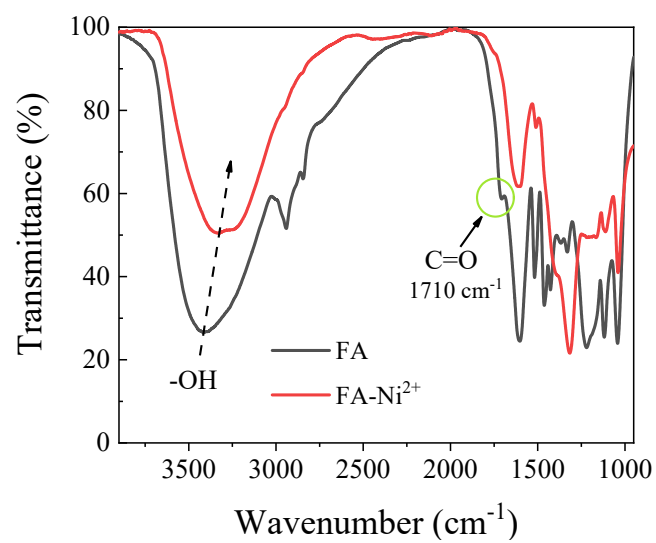

**Fig. S1.** FT-IR spectra of Fulvic acid (FA) and FA-Ni<sup>2+</sup>.

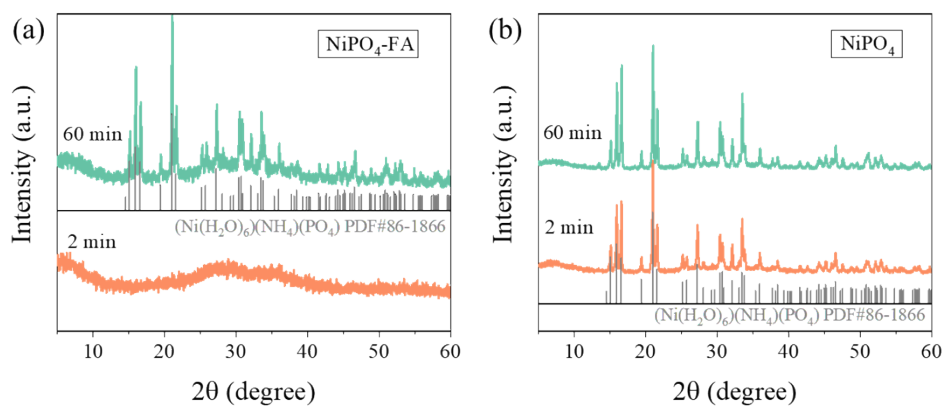

**Fig. S2.** XRD patterns of solids containing  $\text{NiPO}_4$  precipitated at two different mixing times and conditions: (a) in fulvic acid (FA) solution ( $\text{NiPO}_4\text{-FA}$ ) and (b) in deionized water ( $\text{NiPO}_4$ ).

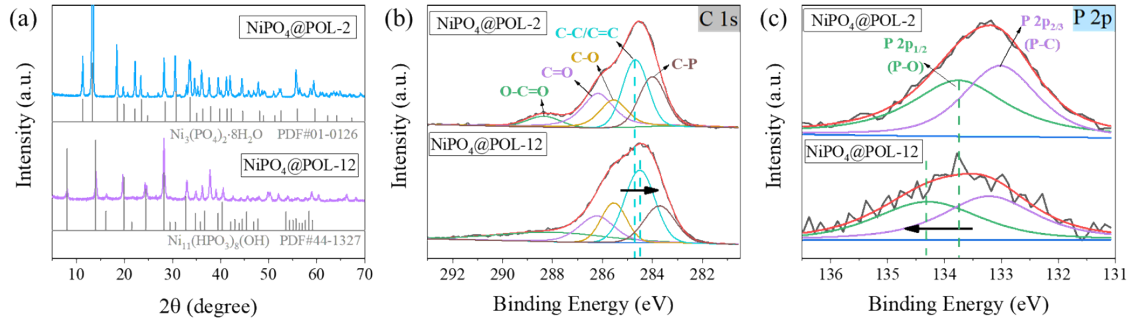

**Fig. S3.** XRD patterns of (a)  $\text{NiPO}_4@\text{POL-2}$  and (b)  $\text{NiPO}_4@\text{POL-12}$  in FA solution. High-resolution XPS spectra of: (b) C 1s, (c) P 2p core-level spectra of  $\text{NiPO}_4@\text{POL-2}$  and  $\text{NiPO}_4@\text{POL-12}$  ( $\text{NiPO}_4@\text{POL-}t$ ,  $t$  represents the hydrothermal reaction time at 200 °C).

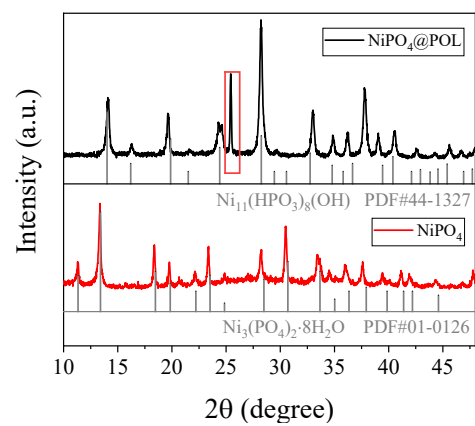

**Fig. S4.** XRD patterns of NiPO<sub>4</sub>@POL-24 and NiPO<sub>4</sub> (hydrothermal time: 24 h).

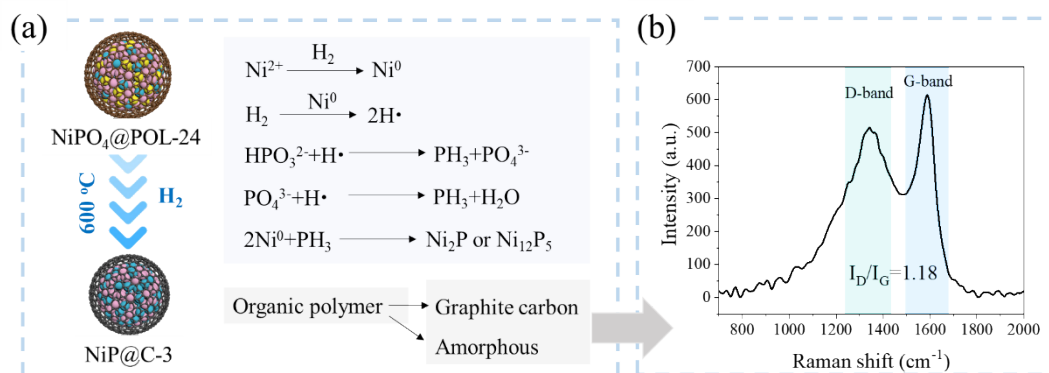

**Fig. S5.** (a) Chemical reactions during reduction and carbonization of NiPO<sub>4</sub>@POL-24 to NiP@C-3 under a hydrogen atmosphere, (b) Raman spectra of NiP@C-3 ( $I_D$  and  $I_G$  are the D-band and G-band Raman intensities<sup>10</sup>).

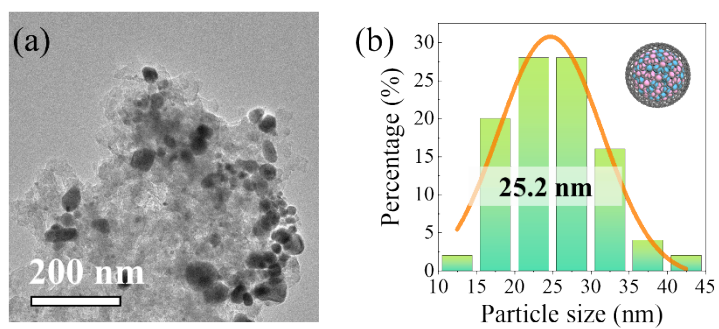

**Fig. S6.** (a) TEM image of NiP@C-3 and (b) particle size statistics of nanoparticles on the NiP@C-3 catalyst.

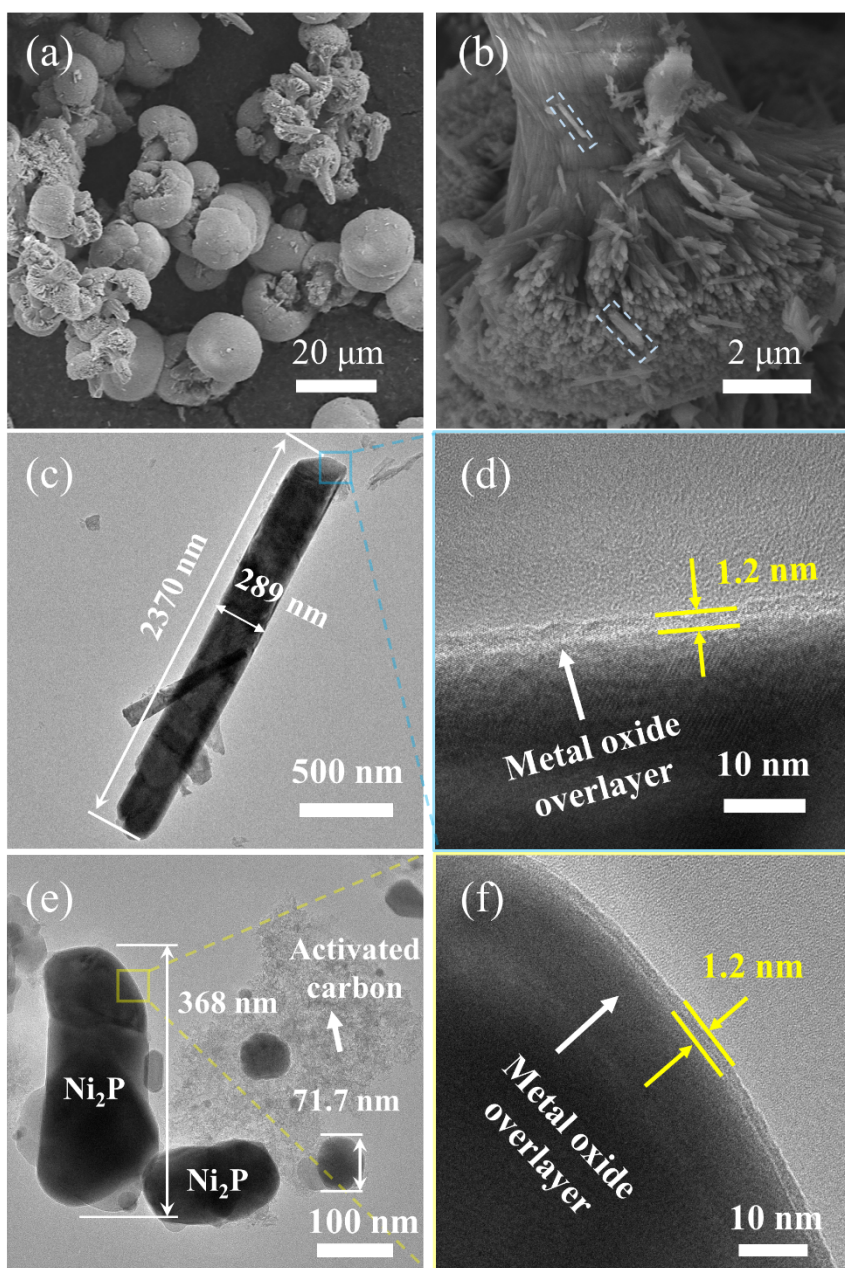

**Fig. S7.** Characterization of NiP (a,b) SEM images, (c) TEM image, (d) HRTEM image; characterization of NiP/AC (e) TEM image, (f) HRTEM image (preparation detailed in supporting information).

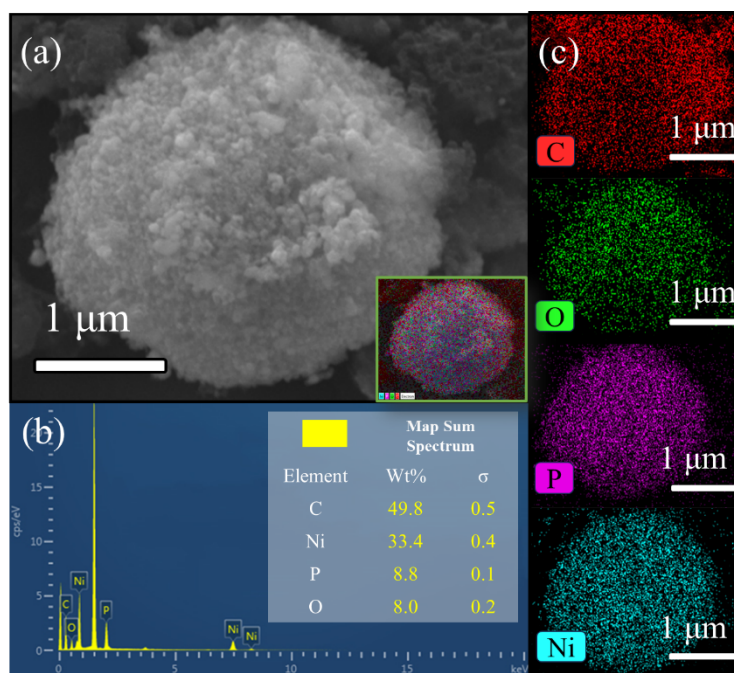

**Fig. S8.** (a) SEM image of NiP@C-3, inset: all elements overlapped mapping, (b) Map sum spectrum of NiP@C-3, (c) Elemental mapping for the same region of NiP@C-3 (C-red, O-green, P-violet and Ni-turquoise).

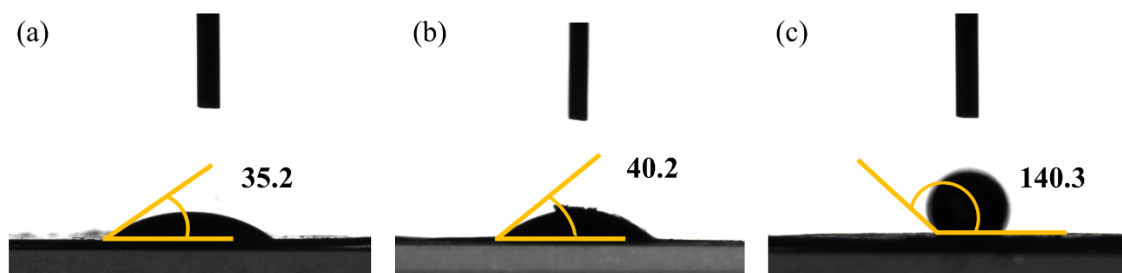

**Fig. S9.** Contact angle of (a) NiP@C-3, (b) NiP/AC and (c) NiP.

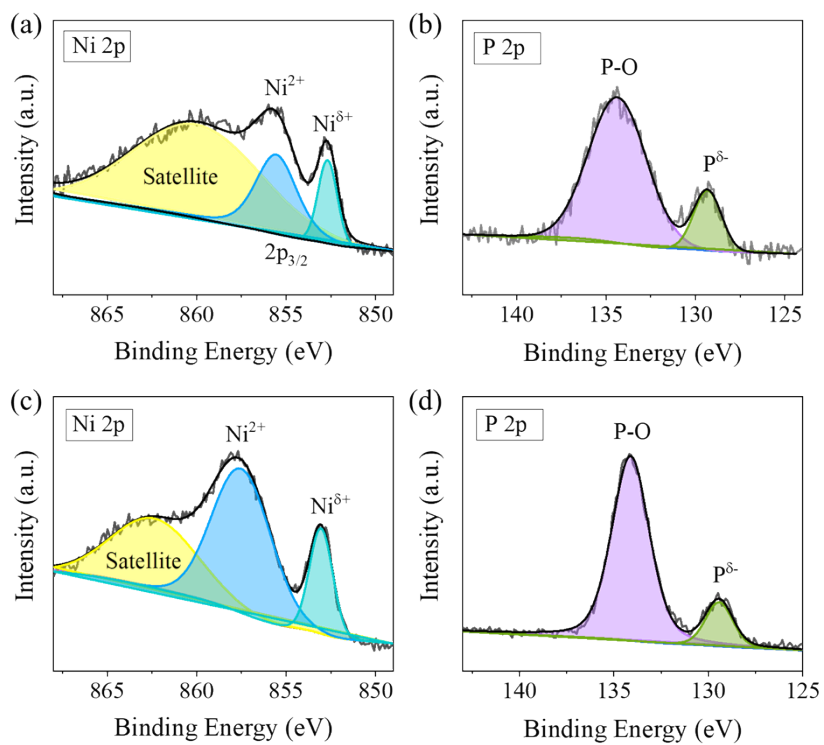

**Fig. S10.** XPS spectra of Ni 2p and P 2p of (a, b) NiP/AC and (c, d) NiP.

**Table S2.** Content of XPS spectrum surface elements in prepared samples.

| Catalysts | Atomic conc. (%) |                  |      |                 |
|-----------|------------------|------------------|------|-----------------|
|           | Ni <sup>2+</sup> | Ni <sup>δ+</sup> | P-O  | P <sup>δ-</sup> |
| NiP@C-3   | 38.7             | 61.3             | 62.8 | 31.8            |
| NiP/AC    | 70.7             | 29.3             | 83.5 | 16.5            |
| NiP       | 78.0             | 22.0             | 86.1 | 13.9            |

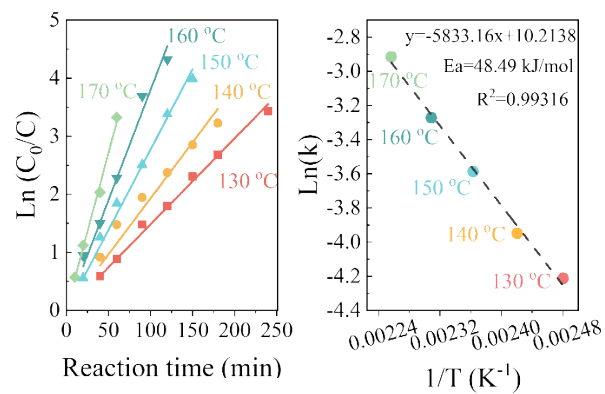

**Fig. S11.** Arrhenius plots of glucose hydrogenation over NiP@C-3. Reaction conditions: 3 MPa  $H_2$ , 3 h, 10 g/L catalyst, 10 g/L glucose.

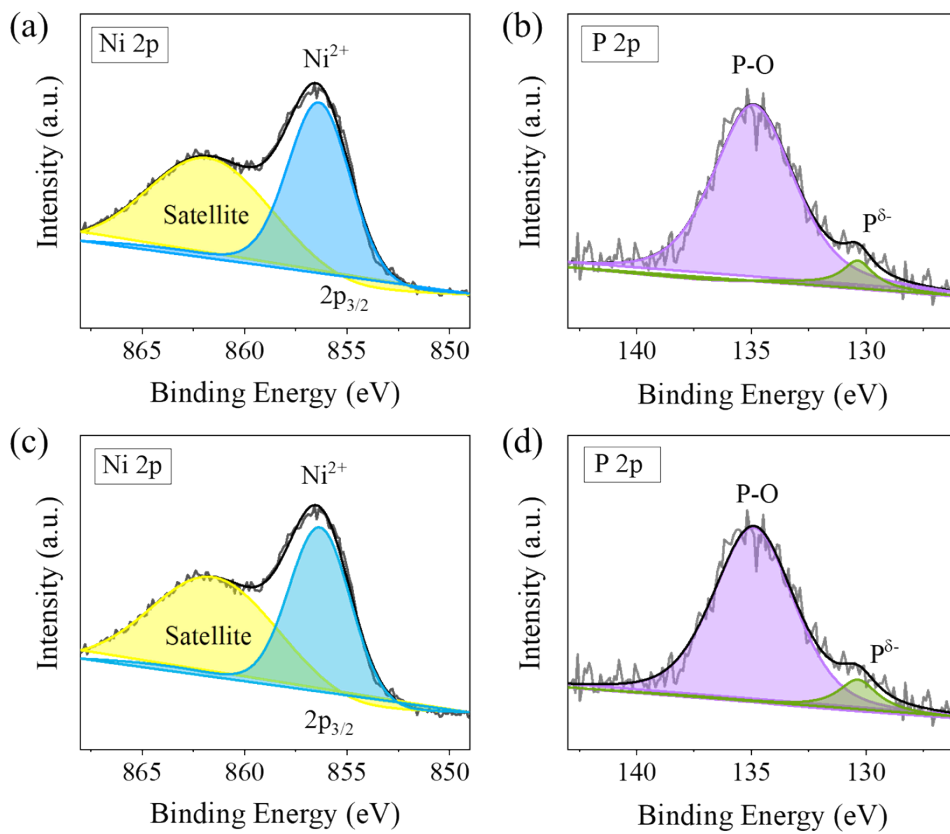

**Fig. S12.** XPS spectra of Ni 2p and P 2p of (a, b) spent NiP/AC and (c, d) spent NiP.

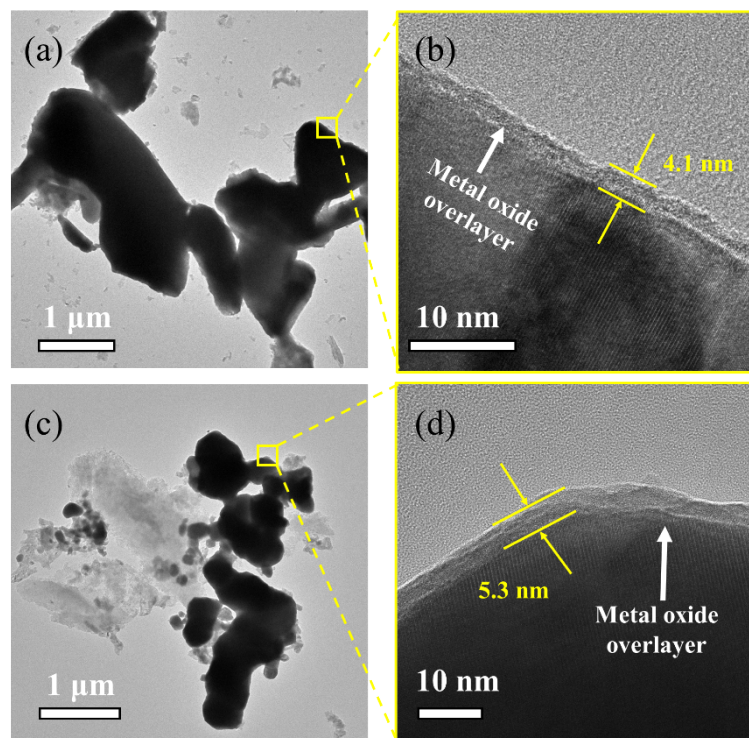

**Fig. S13.** TEM images of (a) spent NiP, (c) spent NiP/AC; HRTEM images of (b) spent NiP, (d) spent NiP/AC.

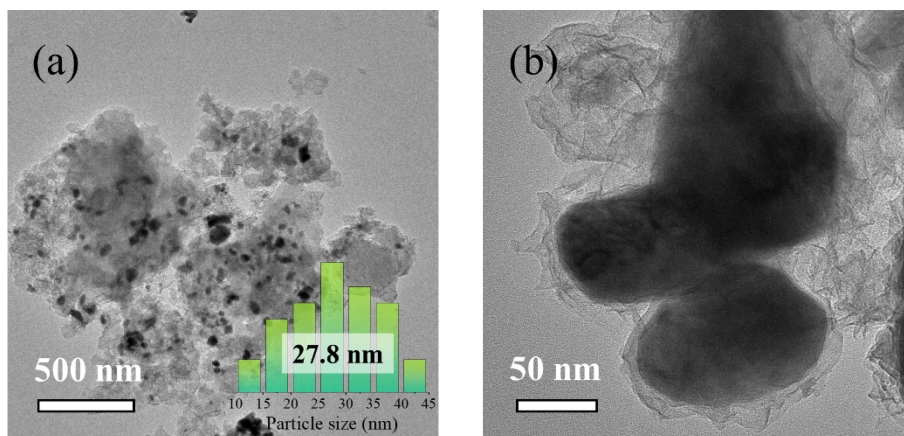

**Fig. S14.** (a) TEM and (b) HRTEM image of spent NiP@C-3.

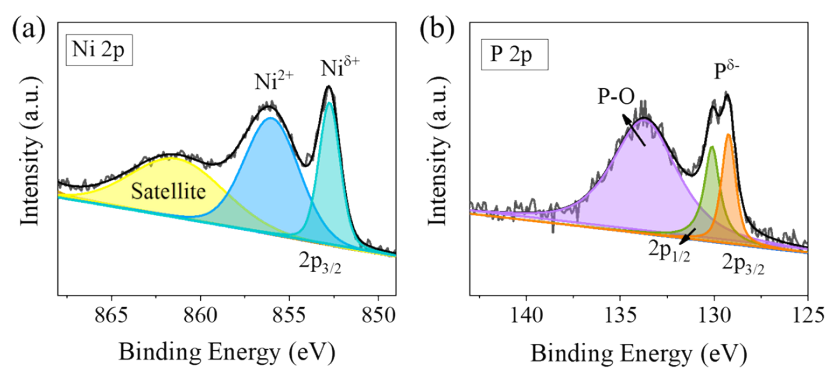

**Fig. S15.** High-resolution XPS measurements of spent NiP@C-3, (a) Ni 2p and (b) P 2p.

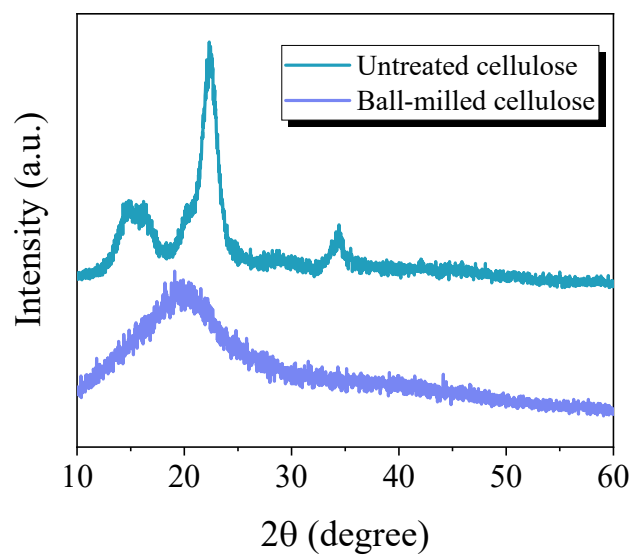

**Fig. S16.** XRD patterns of microcrystalline cellulose before and after ball milling.

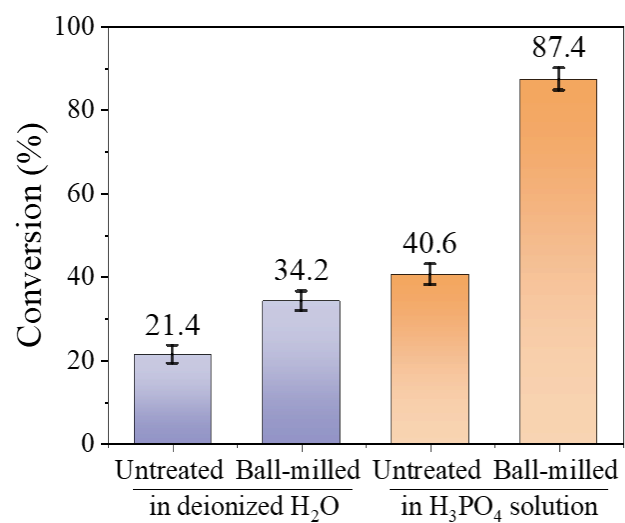

**Fig. S17.** Hydrolytic of untread and ball-milled cellulose in the deionized H<sub>2</sub>O and H<sub>3</sub>PO<sub>4</sub> solution.

Note: Ball milling can reduce the crystallinity of cellulose and increases the availability of acidic sites, especially in the homogeneous acid (phosphoric acid) catalytic process

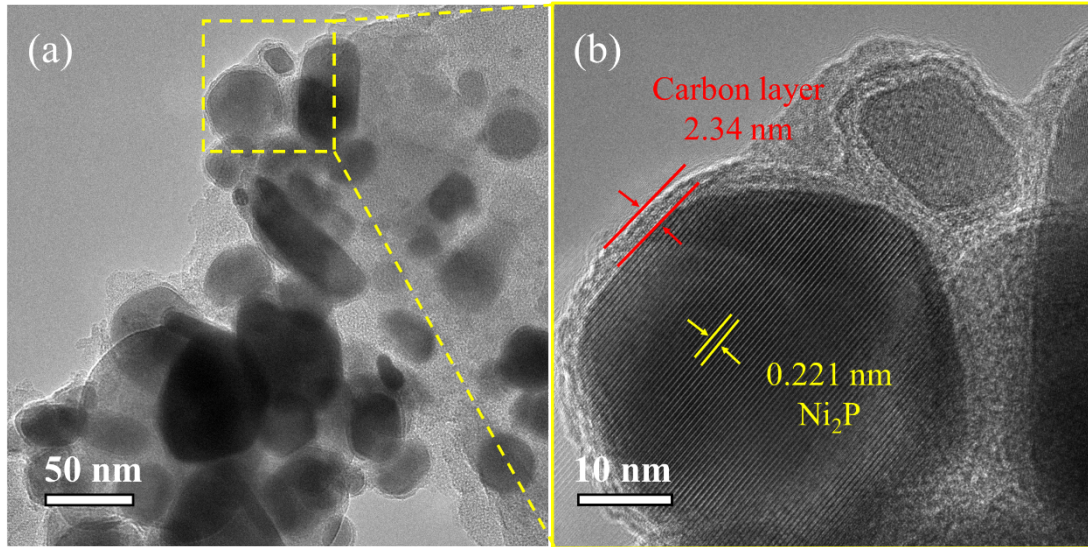

**Fig. S18.** (a) TEM diagram of catalyst for ball milling for 3 hours, (b) local high-resolution TEM image.

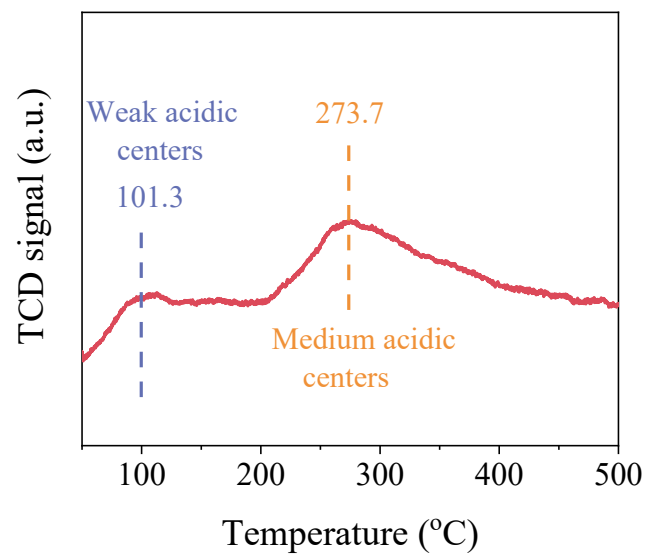

**Fig. S19.** NH<sub>3</sub>-TPD profile of NiP@C-3 catalyst.

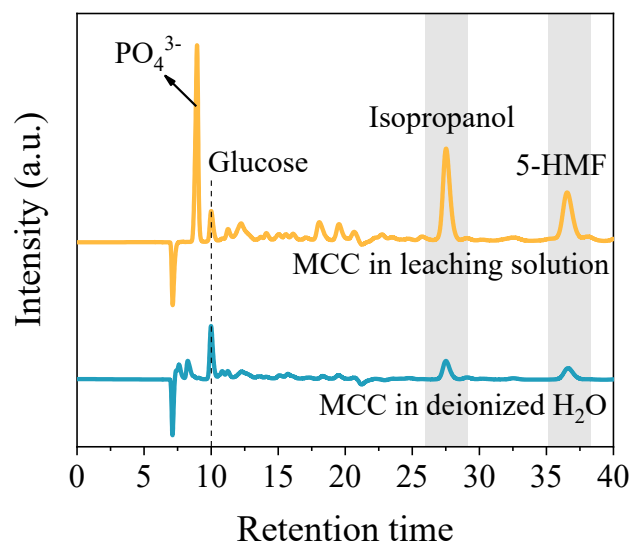

**Fig. S20.** HPLC chromatogram of cellulose conversion in deionized H<sub>2</sub>O and catalyst leaching solution at 200 °C for 3 h.

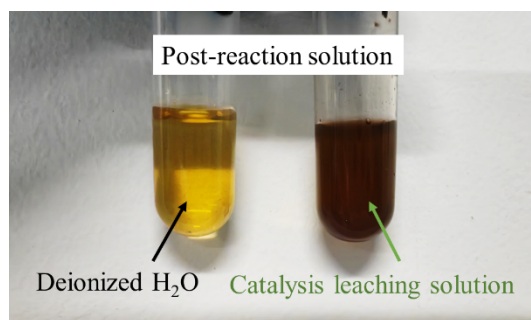

**Fig. S21.** Humins generated from cellulose hydrolysis in the 5 mL of deionized H<sub>2</sub>O and catalysis leaching solution system (50 mg ball-milled cellulose, 200 °C, 3 h, 4MPa H<sub>2</sub>).

**Table S3.** Leaching phosphoric concentration and pH of cellulose reaction solution over the NiP, NiP@freeC and NiP@C-3 catalyst.

| Catalyst  | Phosphate concentration (mg/L) | pH   |
|-----------|--------------------------------|------|
| NiP       | 663                            | 1.83 |
| NiP@freeC | 682                            | 1.75 |
| NiP@C-3   | 389                            | 3.09 |

Reaction condition: 50 mg catalyst and 50 mg cellulose mix milled, 5 mL deionized water, 4 MPa H<sub>2</sub>, 200 °C for 3 h.

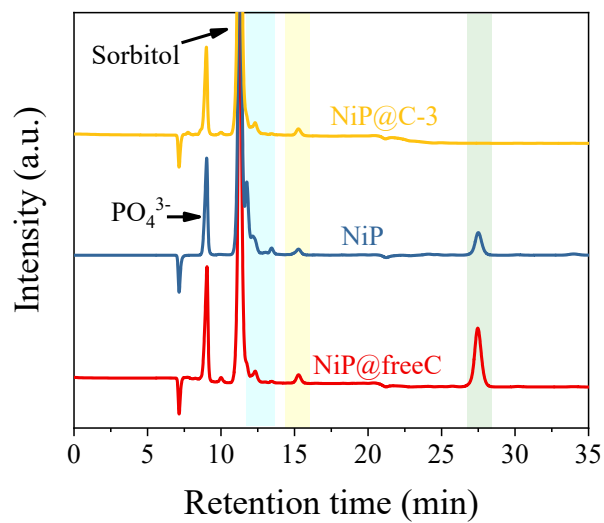

**Fig. S22.** HPLC chromatogram of cellulose conversion over the NiP@C-3, NiP and NiP@freeC at 200 °C for 3 h (reactant: microcrystalline cellulose, pretreatment method: mix milled).

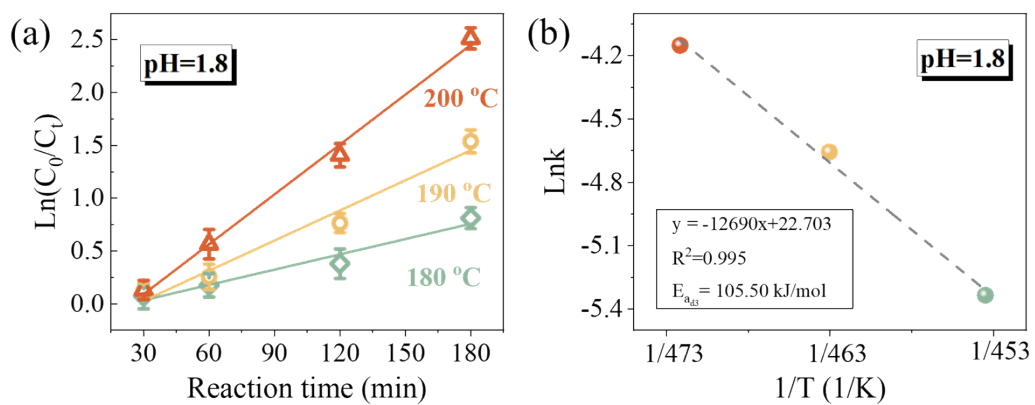

**Fig. S23.** Arrhenius plots of glucose degradation in the NiP catalysis system simulated by using pH=1.8 of H<sub>3</sub>PO<sub>4</sub> solution (reaction condition: 5 mL H<sub>3</sub>PO<sub>4</sub> solution, 10 g/L catalyst, 10 g/L glucose, 4MPa H<sub>2</sub>).

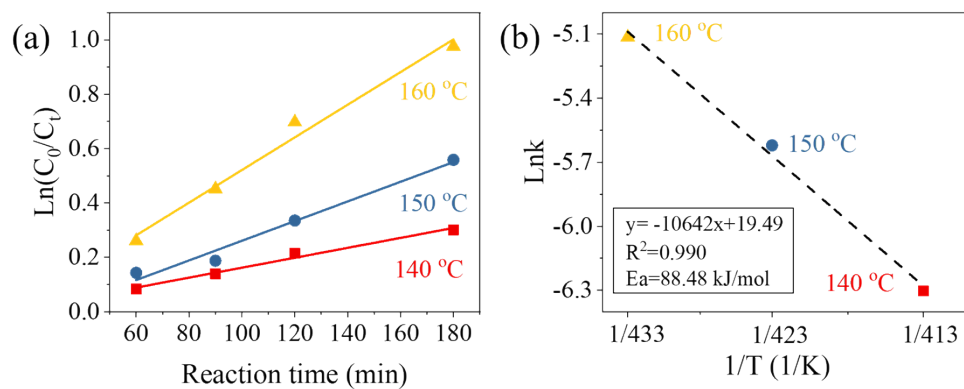

**Fig. S24.** Arrhenius plots of glucose hydrogenation over the NiP (reaction condition: 10 g/L catalyst, 10 g/L glucose, 3MPa H<sub>2</sub>).

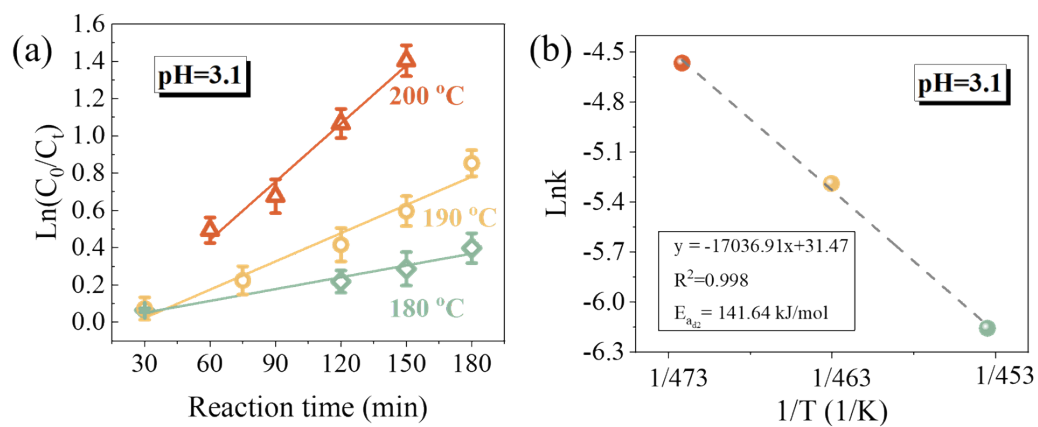

**Fig. S25.** Arrhenius plots of glucose degradation in the NiP@C-3 catalysis system simulated by using pH=3.1 of H<sub>3</sub>PO<sub>4</sub> solution (reaction condition: 5 mL H<sub>3</sub>PO<sub>4</sub> solution, 10 g/L catalyst, 10 g/L glucose, 3MPa H<sub>2</sub>).

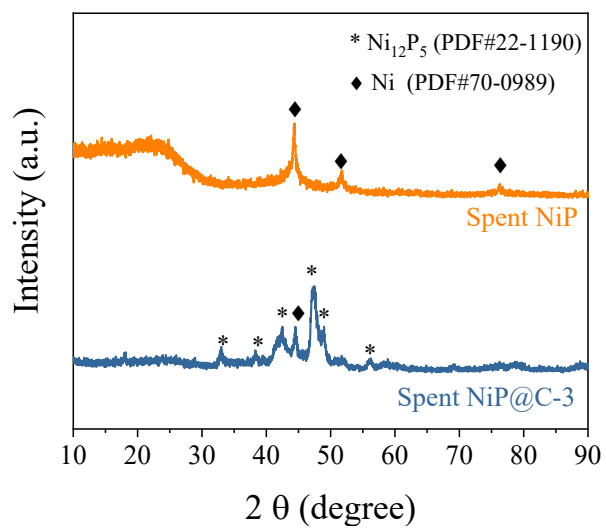

**Fig. S26.** XRD patterns of spent NiP@C-3 and spent NiP.

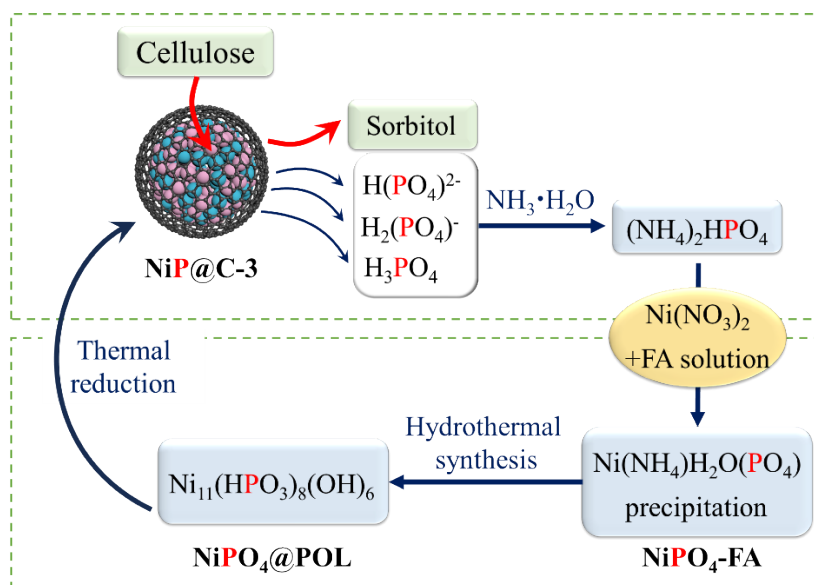

Fig. S27. Scheme of preparation, recycle, and regeneration of catalyst.

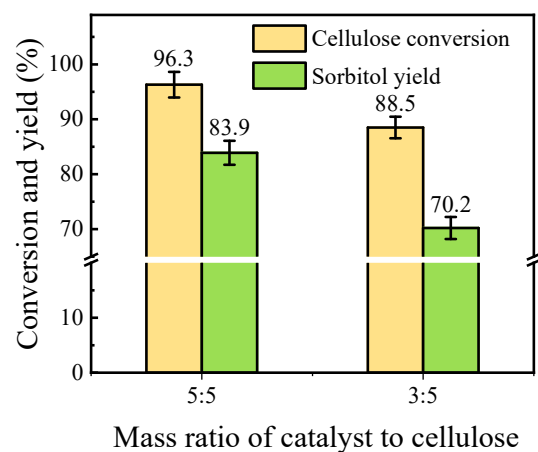

**Fig. S28.** Catalytic performance for two catalyst-cellulose ratios (reaction condition: 50 mg cellulose, 50 mg catalyst (5:5) or 30 mg catalyst (3:5), 5 mL H<sub>2</sub>O, 200 °C reaction temperature, 4 MPa partial pressure H<sub>2</sub>, 3 h reaction time).

## References

1. Kresse and Hafner, *Physical review. B, Condensed matter*, 1993, **47**, 558-561.
2. Kresse and Hafner, *Physical review. B, Condensed matter*, 1994, **49**, 14251-14269.
3. G. Kresse and J. Furthmüller, *Comput. Mater. Sci*, 1996, **6**, 15-50.
4. Kresse and Furthmuller, *Physical review. B, Condensed matter*, 1996, **54**, 11169-11186.
5. Blochl, *Physical review. B, Condensed matter*, 1994, **50**, 17953-17979.
6. G. Kresse and D. Joubert, *Physical Review B*, 1999, **59**, 1758-1775.
7. Perdew, Burke and Ernzerhof, *Phys. Rev. Lett.*, 1996, **77**, 3865-3868.
8. S. Grimme, J. Antony, S. Ehrlich and H. Krieg, *The Journal of Chemical Physics*, 2010, DOI: 10.1063/1.3382344.
9. J. Rossmeisl, A. Logadottir and J. K. Nørskov, *Chem. Phys.*, 2005, DOI: 10.1016/j.chemphys.2005.05.038.
10. P. Pachfule, D. Shinde, M. Majumder and Q. Xu, *Nature chemistry*, 2016, **8**, 718-724.
